# Supplementary material for: Hypoxia acclimation alters reactive oxygen species homeostasis and oxidative status in estuarine killifish (Fundulus heteroclitus)
Source: Oxford University Press journal article supplement (doi:10.1242/jeb.222877), 2020-01-01
Supplement: jeb222877supp.pdf [file jeb222877supp.pdf]

Table S1: Statistical results of one-way ANOVA in the normoxia control group to assess circadian rhythms in the absence of hypoxia.

|                     | Main effects of time<br>in the muscle |        | Main effects of time<br>in the liver |        |
|---------------------|---------------------------------------|--------|--------------------------------------|--------|
|                     | F                                     | P      | F                                    | P      |
| Oxidation potential | 2.606 (5, 67)                         | 0.0326 | 5.442 (5, 73)                        | 0.0003 |
| [GSH+GSSG]          | 1.952 (5, 66)                         | 0.0974 | 0.3992 (5, 69)                       | 0.8478 |
| [GSH]               | 1.637 (5, 65)                         | 0.1628 | 0.3566 (5, 68)                       | 0.8763 |
| [GSSG]              | 1.573 (5, 66)                         | 0.1799 | 1.851 (5, 67)                        | 0.1148 |
| [GSH]:[GSSG]        | 0.9568 (5, 66)                        | 0.4507 | 1.178 (5,66)                         | 0.3292 |
| Lipid peroxidation  | 1.260 (5, 66)                         | 0.2916 | 1.437 (5, 69)                        | 0.2220 |
| Aconitase           | 0.4448 (5, 65)                        | 0.8155 | ----                                 | ----   |
| TOSC                | 0.6090 (5, 67)                        | 0.6932 | 3.191 (5, 76)                        | 0.0114 |
| Catalase            | 1.147 (5, 69)                         | 0.3441 | 1.075 (5, 64)                        | 0.3825 |
| GPX                 | 2.396 (5, 65)                         | 0.0467 | 1.847 (5, 63)                        | 0.1165 |

GPX, glutathione peroxidase; GSH, reduced glutathione; GSSG, oxidized glutathione; TOSC, total oxidant scavenging capacity. The degrees of freedom for the numerator and the denominator, respectively, for each ANOVA are reported in parentheses.
